# Supplementary material for: Probiotics for the management of irritable bowel syndrome: a systematic review and three-level meta-analysis
Source: PubMed Central journal article supplement (PMC10651259; doi:10.1097/js9.0000000000000658), 2023-08-10

## Identification of studies via databases and registers

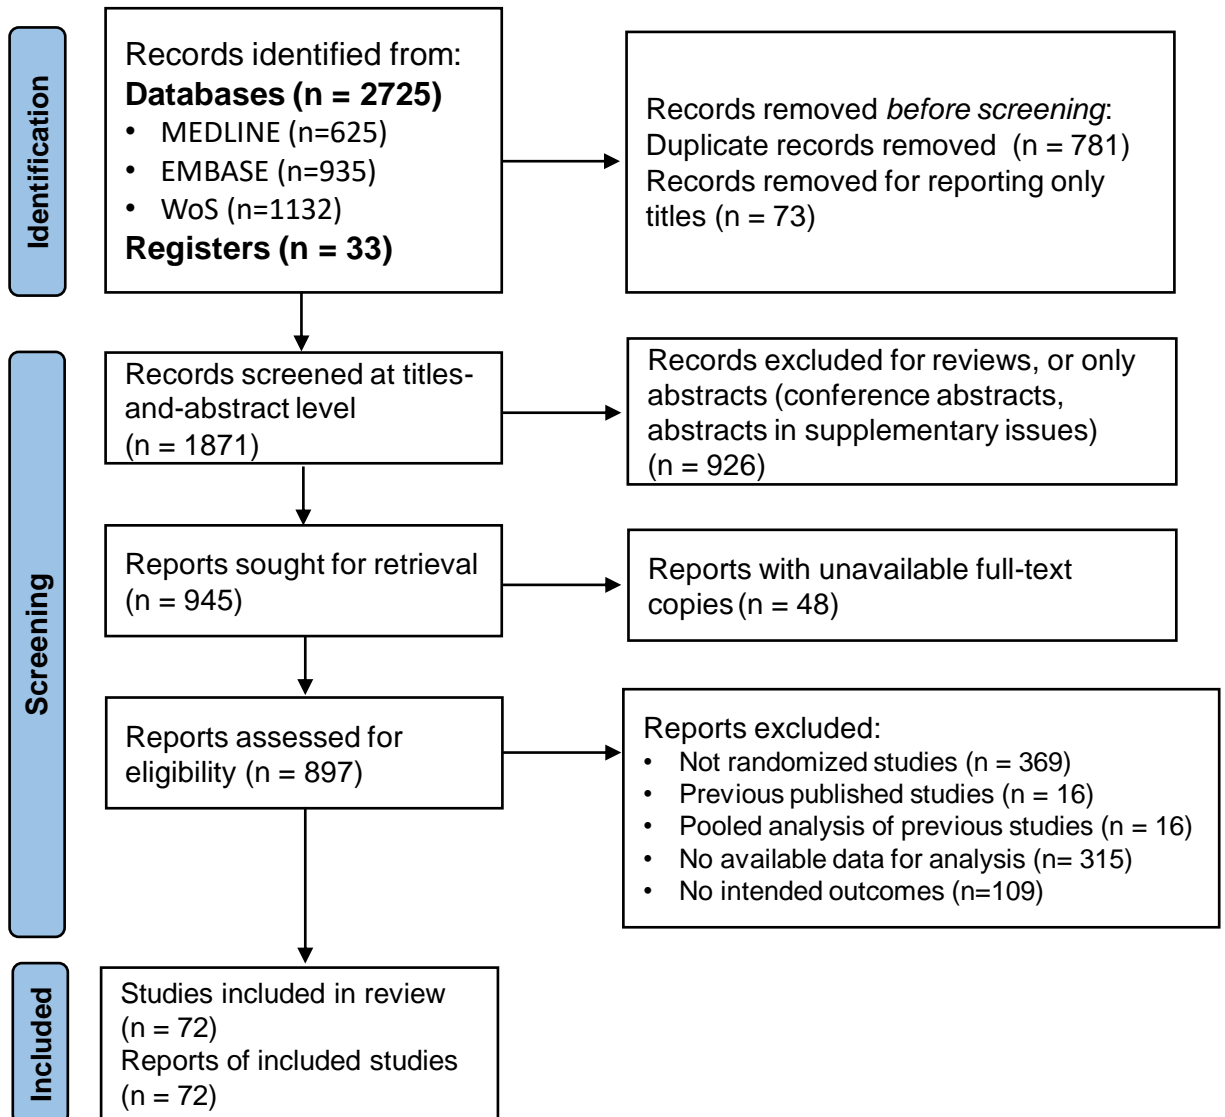

Supplement: js9-109-3631-s002.pdf [file js9-109-3631-s002.pdf]
